# Supplementary material for: Aldehyde Dehydrogenase Polymorphisms and Blood Pressure Elevation in the Japanese: A Cross-Sectional and a Longitudinal Study over 20 Years in the Shimane CoHRE Study
Source: Hindawi journal article supplement (doi:10.1155/2015/825435), 2015-01-01
Supplement: f1 [file 825435.f1.pdf]

Table S1. Evaluation of risks for hypertension in daily drinkers and in occasional/non drinkers

1) Daily drinkers

| <u>Risk factor</u>   | <u>Odds (95% C.I.)</u> | <u>p value</u>      |
|----------------------|------------------------|---------------------|
| Age                  | 1.06 (1.04 - 1.08)     | $2 \times 10^{-15}$ |
| BMI                  | 1.23 (1.17 - 1.30)     | $7 \times 10^{-14}$ |
| <i>ALDH2</i> Glu/Glu | 1.28 (0.91 - 1.83)     | 0.16                |

2) Occasional/non drinkers

| <u>Risk factor</u>   | <u>Odds (95% C.I.)</u> | <u>p value</u>      |
|----------------------|------------------------|---------------------|
| Age                  | 1.08 (1.07 - 1.09)     | $2 \times 10^{-16}$ |
| BMI                  | 1.21 (1.18 - 1.26)     | $2 \times 10^{-16}$ |
| <i>ALDH2</i> Glu/Glu | 1.27 (1.06 - 1.52)     | 0.008               |

Table S2. Linear regression analysis on factors influencing  $\Delta$ SBP in the longitudinal study

Male

|                   | Estimate $\beta$ | Std. Error | p value                                |
|-------------------|------------------|------------|----------------------------------------|
| (Intercept)       | 1.13575          | 9.30957    | n/s (0.9)                              |
| <i>ALDH2*1/*1</i> | 1.91000          | 2.73191    | n/s (0.49)                             |
| age               | 0.04288          | 0.12771    | n/s (0.74)                             |
| $\Delta$ BMI      | 2.68919          | 0.66613    | <b><math>7.8 \times 10^{-5}</math></b> |
| non-drinker       | 3.28719          | 2.69969    | n/s (0.23)                             |

Female

|                   | Estimate $\beta$ | Std. Error | p value    |
|-------------------|------------------|------------|------------|
| (Intercept)       | 14.11211         | 13.00460   | n/s (0.28) |
| <i>ALDH2*1/*1</i> | -3.57603         | 2.03483    | n/s (0.07) |
| age               | 0.02461          | 0.10136    | n/s (0.81) |
| $\Delta$ BMI      | 0.72083          | 0.47035    | n/s (0.13) |
| non-drinker       | 0.86587          | 10.74908   | n/s (0.94) |

$\Delta$ BMI indicates change in BMI between 1987 and 2006. In this analysis, 'non-drinker' was defined as an individual who was non-drinker both in 1987 and in 2006. n/s: not significant.
